# Supplementary material
Source: MDPI journal article supplement (https://www.mdpi.com/1999-4907/11/10/1058)
Supplement: s1 [file s1]

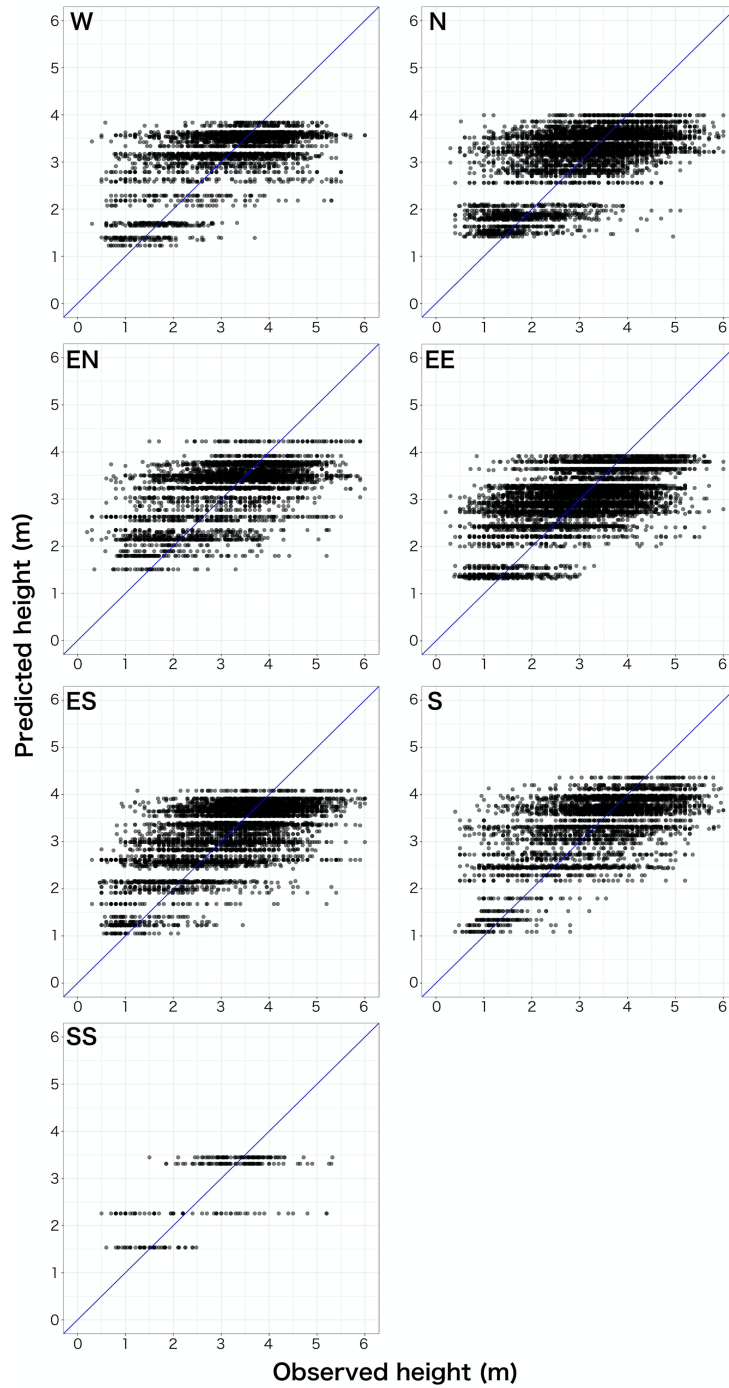

**Figure S 1.** Relationships between observed and predicted tree heights. Blue lines show  $y=x$ .  $R^2$  for each region group were 0.32, 0.36, 0.3, 0.33, 0.38, 0.38, and 0.45 for W, N, EN, EE, ES, S, and SS, respectively.
