# Supplementary material
Source: MDPI journal article supplement (https://www.mdpi.com/1999-4907/11/10/1058)
Supplement: s1 [file s1]

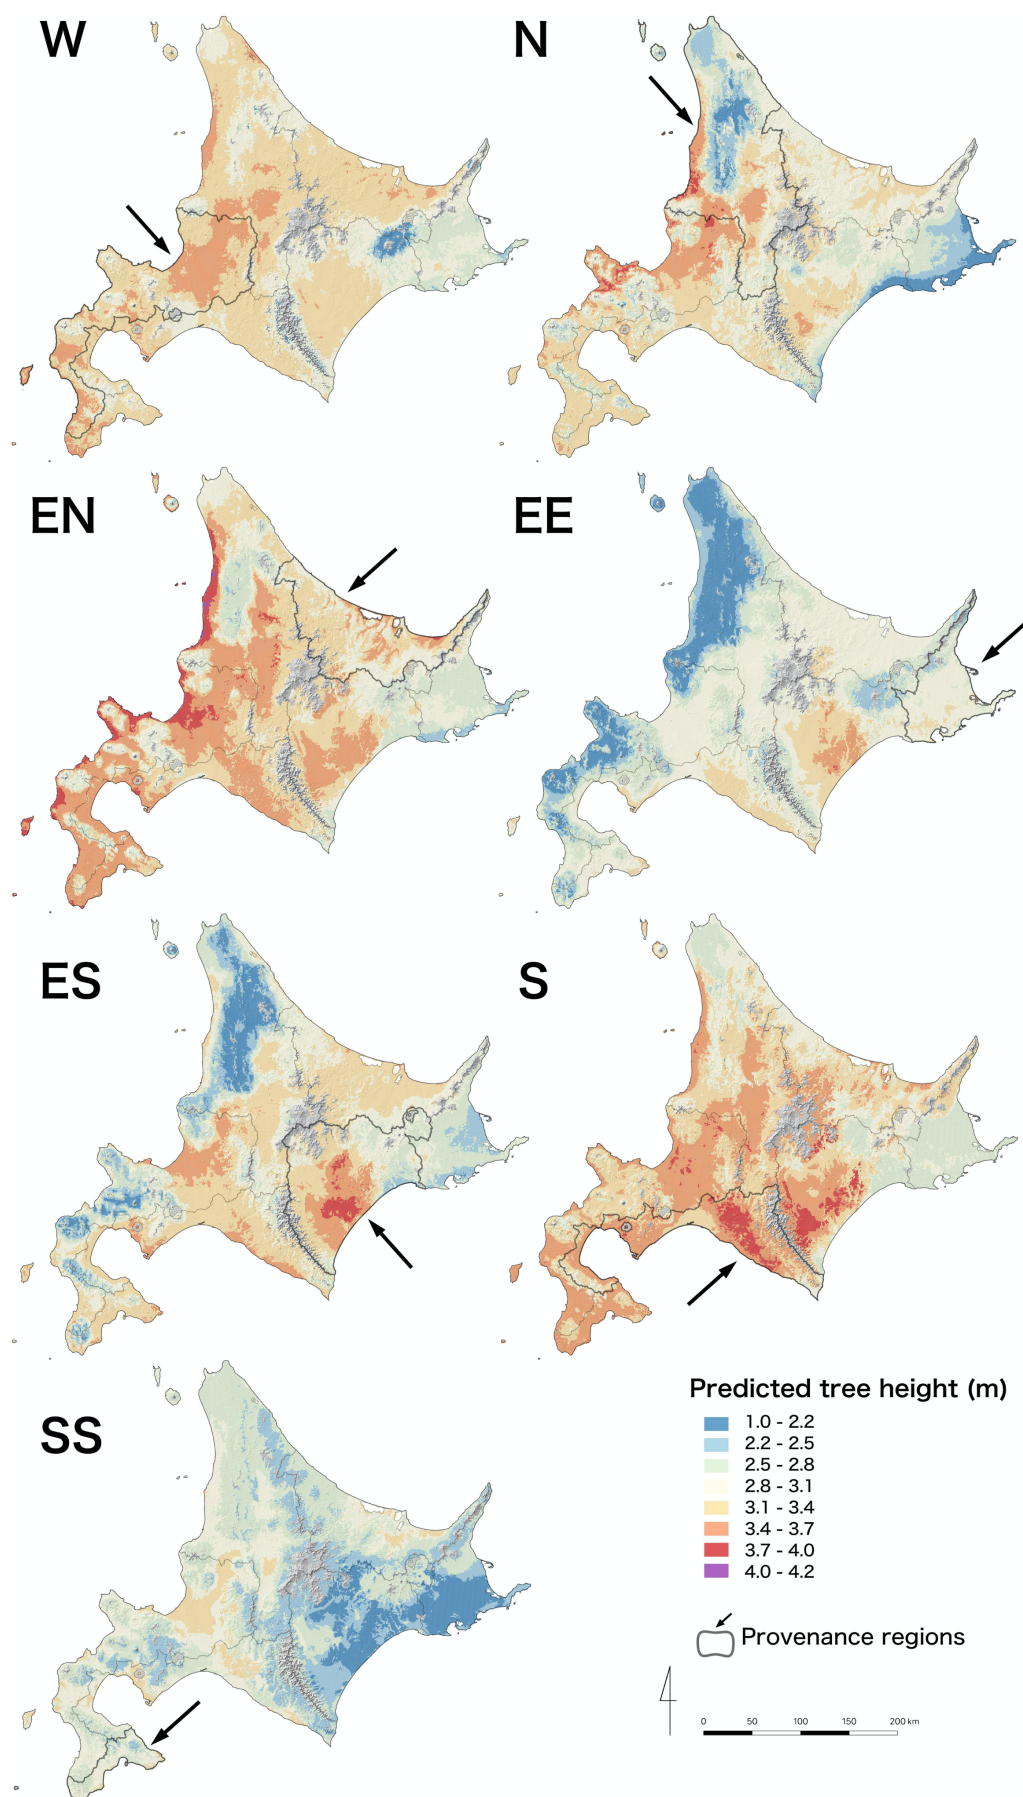

**Figure S 2.** Predicted tree heights at 10 years after planting for each provenance region. Local regions were shown in bold lines and black arrows.
