# Supplementary material
Source: MDPI journal article supplement (https://www.mdpi.com/1999-4907/11/10/1058)
Supplement: s1 [file s1]

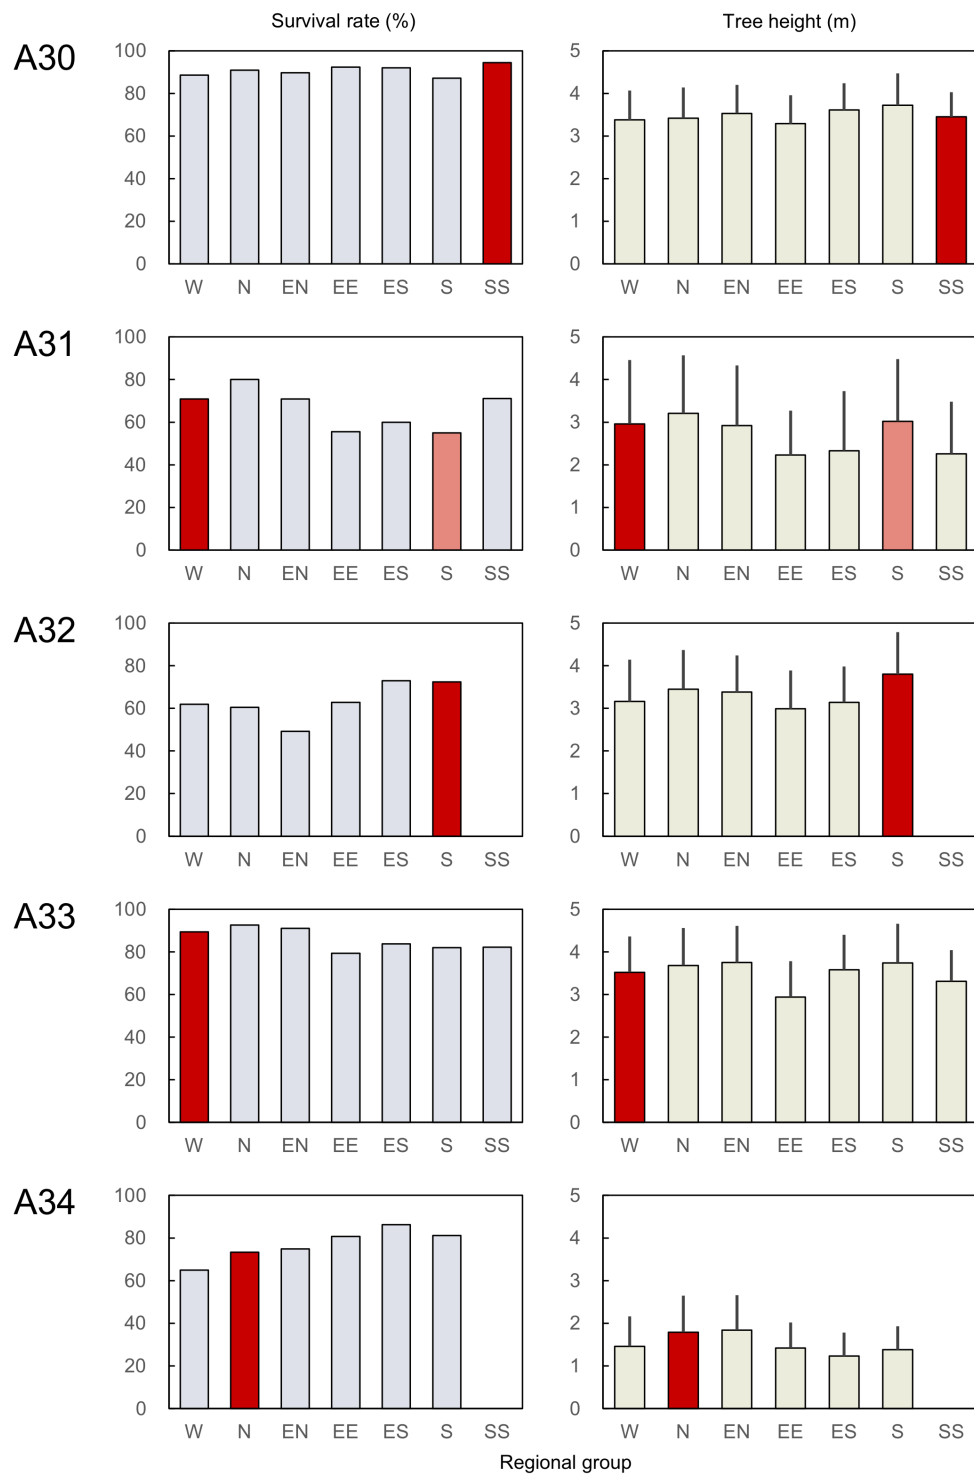

**Figure S 4.** Averaged survival rate (left panels) and tree height with standard deviation (right panels) of transplants for each of the regional groups at each test site. The regional group with red color refers to the local group that the test site is located at the same region. The adjacent group is also shown by light red color, in the case the site was established near the boundary of the regional groups (see Figure 1).

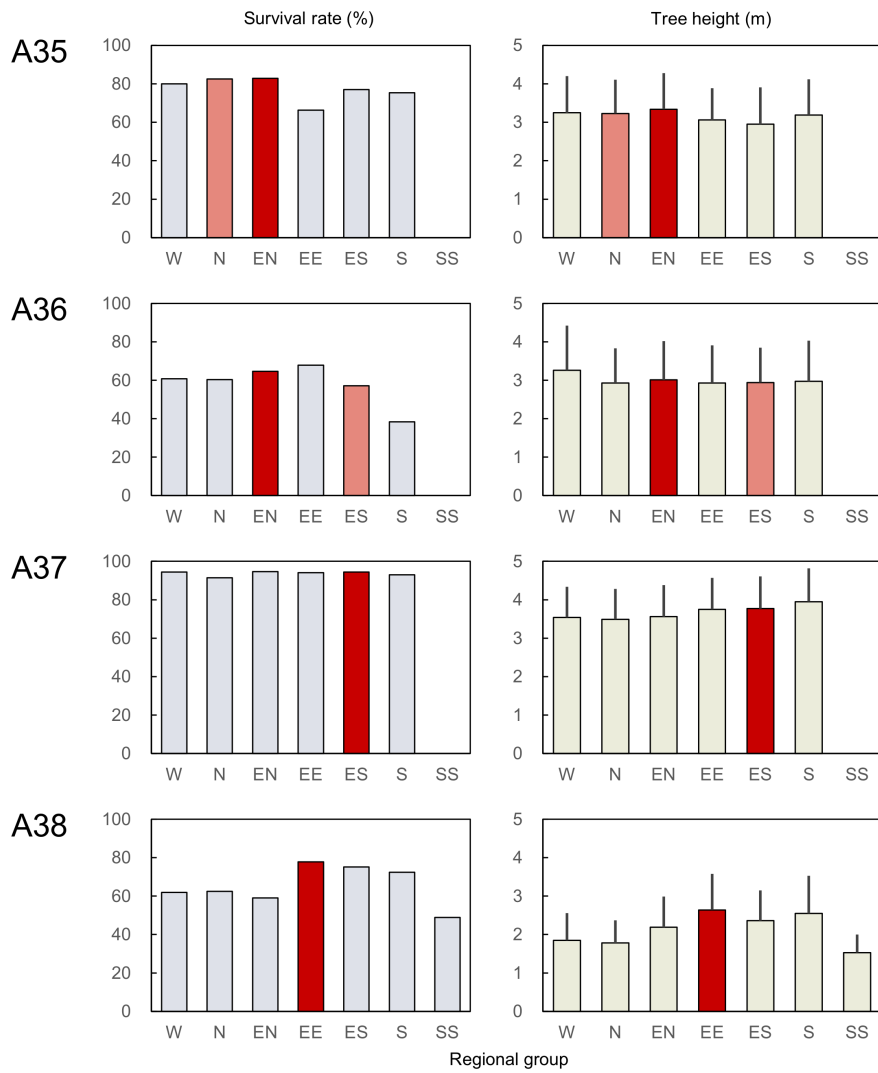

**Figure S 4.** Continued.
