# Supplementary material
Source: MDPI journal article supplement (https://www.mdpi.com/1999-4907/11/10/1058)
Supplement: s1 [file s1]

**Table S 2.** Climatic conditions of testing sites.

| Site<br>code | WI<br>(°C month) | TMC<br>(°C) | PRS<br>(mm) | MSD<br>(m) | WinSR                       | SprSR | SumSR | AutSR | Elevation<br>(m asl.) |
|--------------|------------------|-------------|-------------|------------|-----------------------------|-------|-------|-------|-----------------------|
|              |                  |             |             |            | (0.1MJ/m <sup>2</sup> /day) |       |       |       |                       |
| A30          | 54.7             | −6.8        | 714         | 0.33       | 97                          | 184   | 166   | 129   | 350                   |
| A31          | 54.3             | −11.7       | 555         | 1.53       | 83                          | 186   | 170   | 121   | 370                   |
| A32          | 54.2             | −14.7       | 731         | 0.54       | 92                          | 184   | 169   | 120   | 180                   |
| A33          | 58.8             | −12.0       | 510         | 1.16       | 85                          | 180   | 176   | 128   | 200                   |
| A34          | 49.6             | −17.3       | 497         | 1.72       | 79                          | 180   | 173   | 115   | 180                   |
| A35          | 47.2             | −16.8       | 531         | 0.95       | 85                          | 181   | 178   | 118   | 310                   |
| A36          | 46.1             | −18.8       | 451         | 0.65       | 101                         | 183   | 182   | 123   | 488                   |
| A37          | 48.4             | −17.5       | 616         | 0.61       | 109                         | 187   | 165   | 122   | 490                   |
| A38          | 46.8             | −10.3       | 655         | 0.32       | 103                         | 180   | 166   | 125   | 40                    |
| Average      | 51.1             | −14.0       | 584         | 0.87       | 93                          | 183   | 172   | 122   | 258                   |
