# Supplementary material
Source: MDPI journal article supplement (https://www.mdpi.com/1999-4907/11/10/1058)
Supplement: s1 [file s1]

**Table S 1.** List of seed zones and regional groups of *A. sachalinensis* in Hokkaido, Japan.

| Seed zone    | Region group | No. of families used for provenance tests |
|--------------|--------------|-------------------------------------------|
| West         | W            | 9                                         |
| North        | N            | 18                                        |
| East         | EN           | 9                                         |
|              | ES           | 21                                        |
| Eastern Edge | EE           | 22                                        |
| South        | S            | 9                                         |
|              | SS           | 1 <sup>a</sup>                            |
| Total        |              | 89                                        |

<sup>a</sup> Bulkied seeds from local trees were regarded as one family.
