# Supplementary material
Source: MDPI journal article supplement (https://www.mdpi.com/1999-4907/11/10/1058)

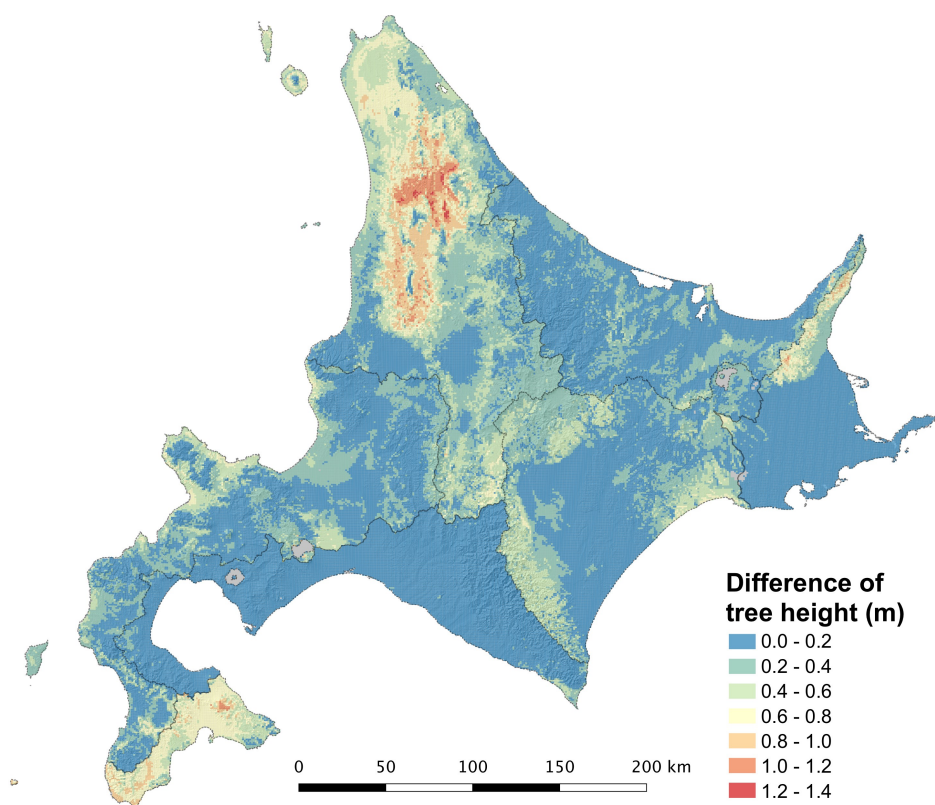

**Figure S 3.** Difference of predicted tree height between using optimum and local seed sources.

Supplement: s1 [file s1]
